# Supplementary material
Source: publisher figshare collection journal article supplement (https://acs.figshare.com/ndownloader/files/4539637)
Supplement: Supplementary file 1 [file 4539637]

# 1 Supporting Information Figure

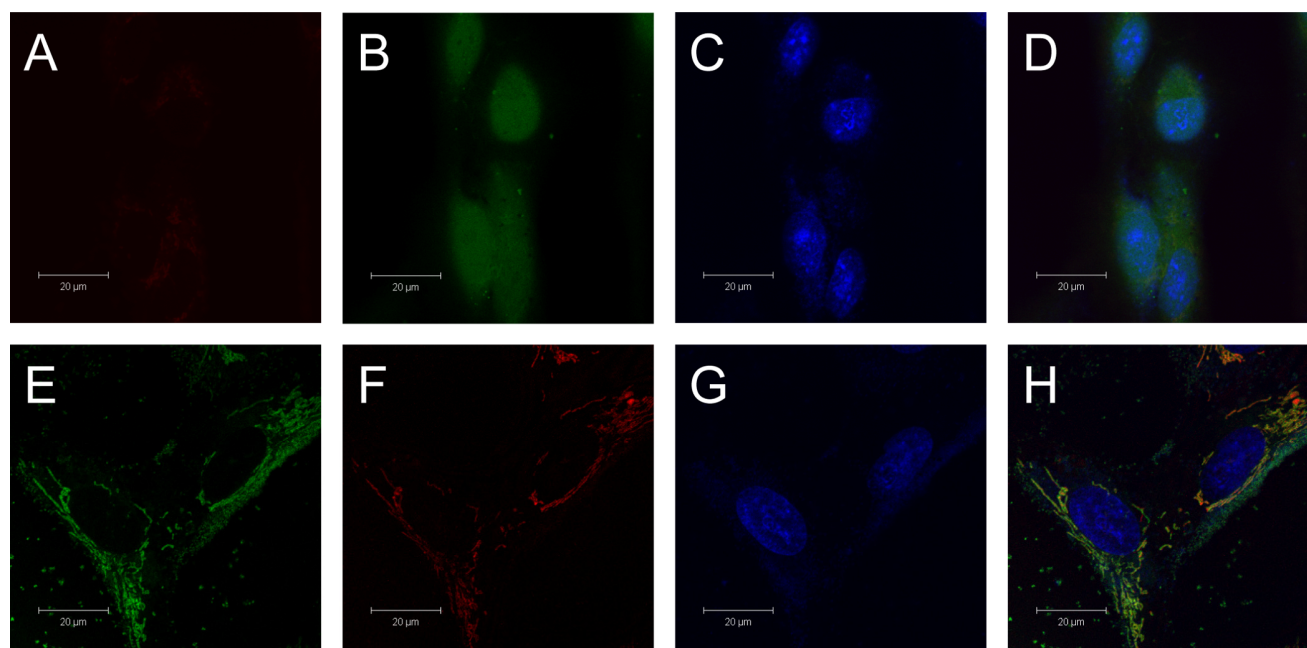

3 **Supporting Information Figure 1.** Effect of catechin (C) on EV71-induced oxidative stress. Vero  
 4 cells were treated with 25  $\mu$ M EGCG, and infected with EV71 at an moi of 1.25. At 48 hr pi, the cells  
 5 were loaded with H<sub>2</sub>DCF and MitoTracker Red (A-D), or MitoSOX Red and MitoTracker Green (E-H);  
 6 counterstained with Hoechst 33342; and confocal images were acquired. The experiment was repeated  
 7 thrice. A representative field of MitoTracker Red- (A), DCF- (B) and Hoechst 33342- (C) labeled cells  
 8 is shown. Another field of MitoTracker Green- (E), MitoSOX Red- (F) and Hoechst 33342- (G) labeled  
 9 cells are shown. The corresponding images are overlaid (D, H). Scale bar: 20  $\mu$ m.
